# Supplementary material for: Effects of a Sudden Drop in Salinity on Immune Response Mechanisms of Anadara kagoshimensis
Source: MDPI journal article supplement (doi:10.3390/ijms20184365), 2019-09-05
Supplement: s1 [file s1]

A

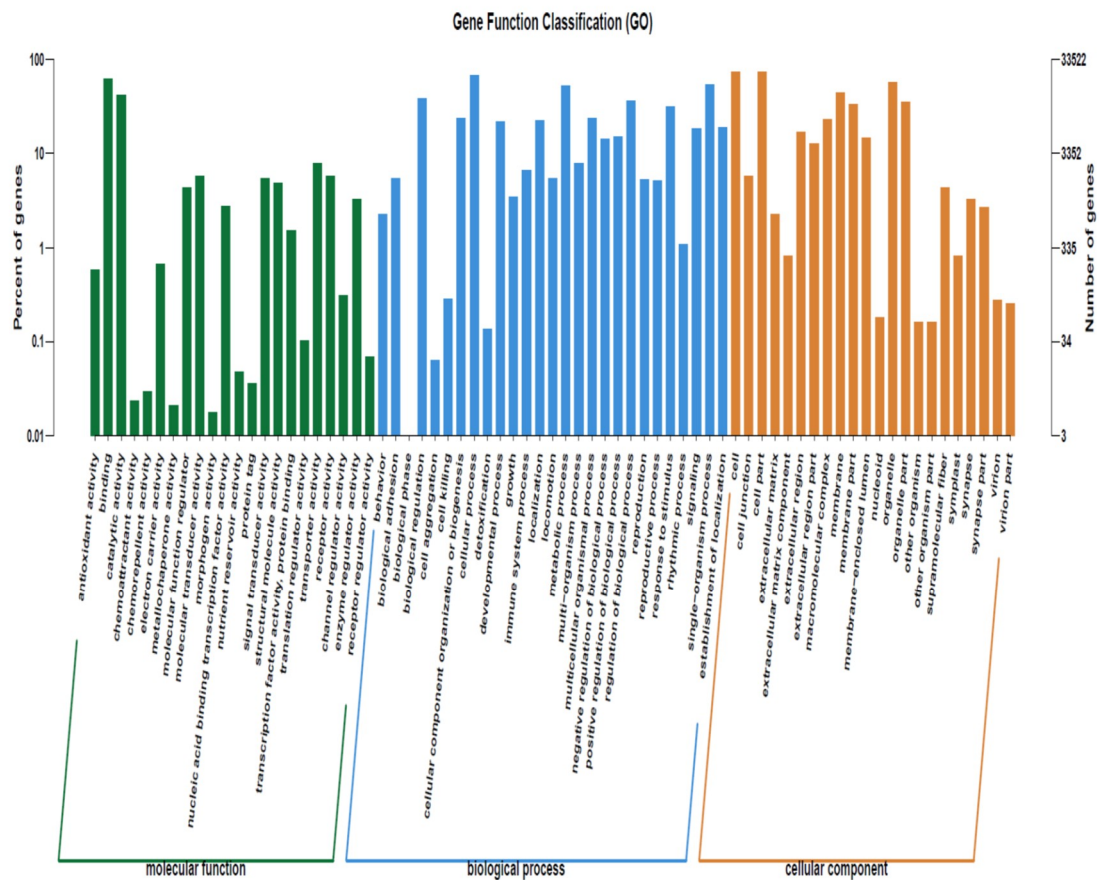

B

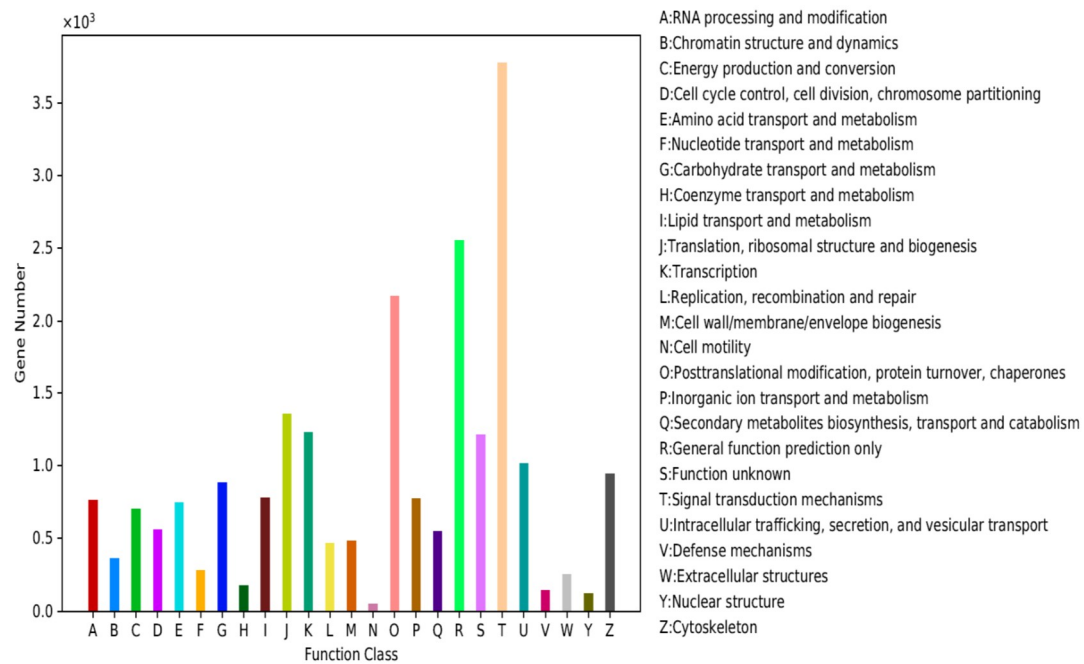

C

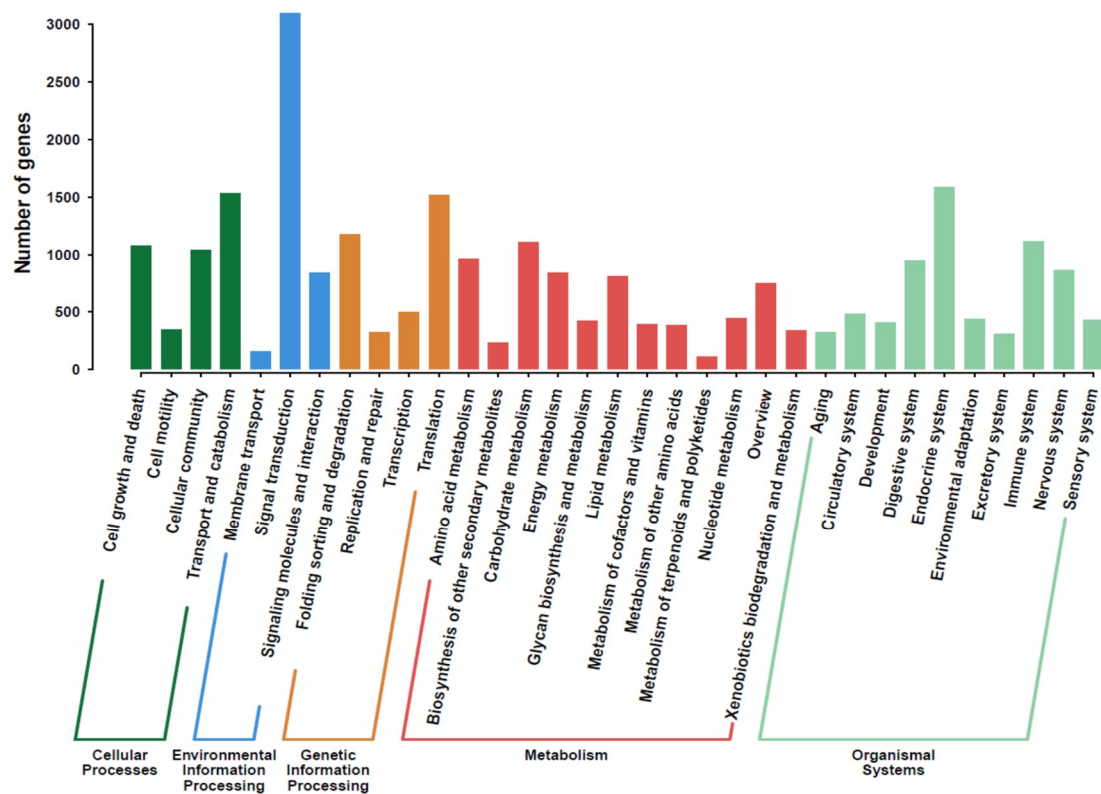

Figure S1. Similarity analysis and gene function annotation in *Anadara kagoshimensis*. A: GO (Gene ontology) classification of the assembled unigenes; B: KOG (EuKaryotic Orthologous Groups) classification of the assembled unigenes; C: KEGG (Kyoto Encyclopedia of Genes and Genomes) annotation analysis of the assembled unigenes.

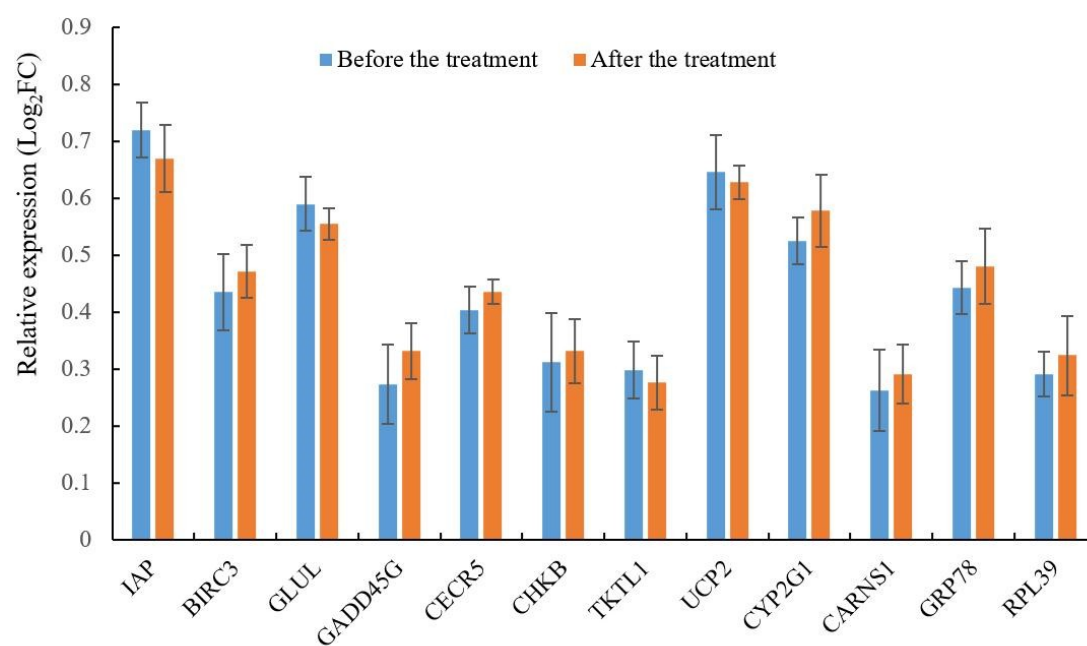

Figure S2. QRT-PCR analysis for 12 DEGs in *Anadara kagoshimensis* before and after 30‰ salinity treatment. The relative expression values were normalized to  $\beta$ -actin gene expression. Vertical bars represent the mean  $\pm$  S.D. (n = 3).
